# Supplementary material for: APPRIS principal isoforms and MANE Select transcripts define reference splice variants
Source: PubMed Central journal article supplement — Bioinformatics. 2022 Sep 18;38(Suppl 2):ii89–94. doi: 10.1093/bioinformatics/btac473 (PMC9486585; doi:10.1093/bioinformatics/btac473), 2022-09-18
Supplement: btac473_supplementary_data.pdf [file btac473_supplementary_data.pdf]

| APPRIS principal versus MANE Select          | Frequency | NS/Syn | Min error | Max error |
|----------------------------------------------|-----------|--------|-----------|-----------|
| Principal, not MANE Select                   | Rare      | 2.127  | 1.971     | 2.291     |
| Principal, not MANE Select                   | Common    | 1.174  | 0.774     | 1.708     |
| Alternative (but MANE Select)                | Rare      | 2.059  | 1.982     | 2.138     |
| Alternative (but MANE Select)                | Common    | 1.487  | 1.229     | 1.784     |
| Principal 263 exons, alternative 801         |           |        |           |           |
|                                              |           |        |           |           |
| MANE Select versus principal                 | Frequency | NS/Syn | Min error | Max error |
| MANE Select, not principal                   | Rare      | 2.066  | 1.942     | 2.196     |
| MANE Select, not principal                   | Common    | 1.710  | 1.281     | 2.236     |
| Alternative (but principal)                  | Rare      | 2.268  | 2.142     | 2.399     |
| Alternative (but principal)                  | Common    | 1.966  | 1.489     | 2.547     |
| MANE Select exons 293, alternative 529       |           |        |           |           |
|                                              |           |        |           |           |
| Longest versus MANE Select                   | Frequency | NS/Syn | Min error | Max error |
| Longest, not MANE Select                     | Rare      | 2.492  | 2.407     | 2.578     |
| Longest, not MANE Select                     | Common    | 2.419  | 2.114     | 2.757     |
| Shorter (but MANE Select)                    | Rare      | 1.884  | 1.796     | 1.976     |
| Shorter (but MANE Select)                    | Common    | 0.949  | 0.717     | 1.233     |
| Longest isoform exons 1578, alternative 1149 |           |        |           |           |

**Supplementary Table 1. Non-synonymous to synonymous ratios for reference and alternative exons.**

Non-synonymous to synonymous ratios for rare and common variants, along with 95% confidence intervals. Non-synonymous to synonymous ratios are shown for exons from reference and alternative transcripts for subsets of MANE Select transcripts, longest isoforms and principal isoforms. Reference transcripts from which exons are selected are (from top to bottom) those that produce APPRIS principal isoforms, but not MANE Select variants, those that generate MANE Select variants, but not APPRIS principal isoforms, and those that produce the longest isoforms, but not MANE Select variants. The number of exons in each reference and alternative set is indicated below each table.

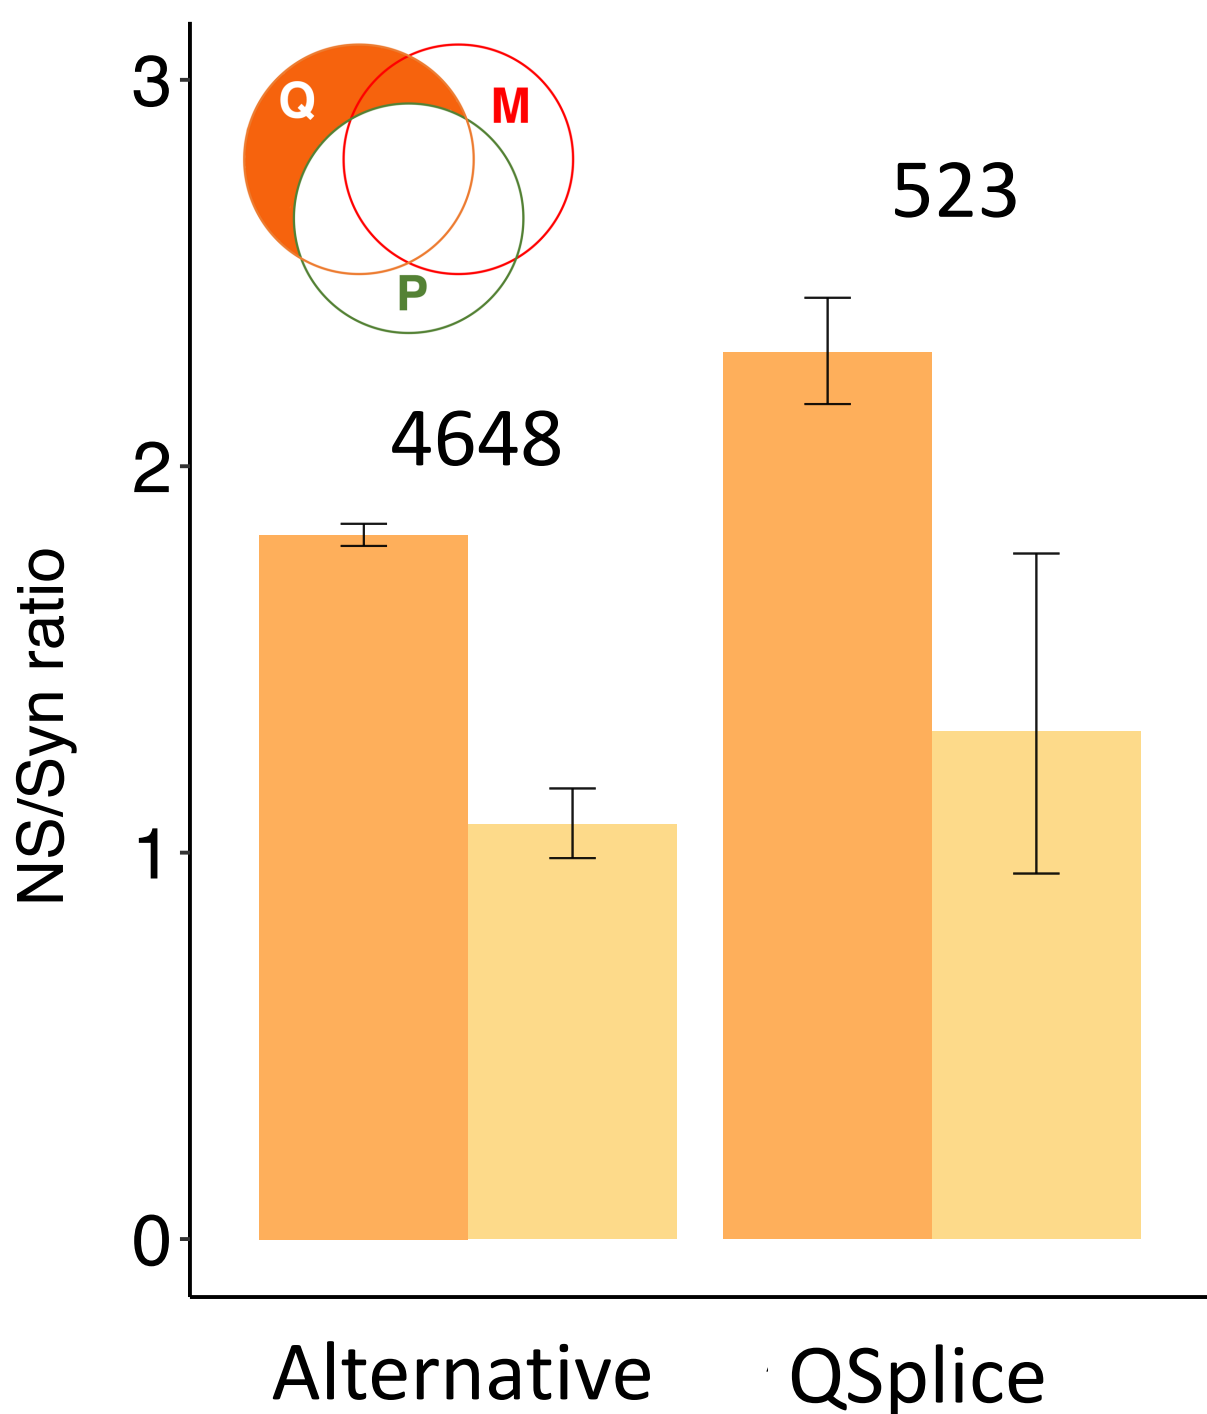

**Supplementary Figure 1. Non-synonymous to synonymous ratios for reference and alternative exons using RNAseq information.**

Non-synonymous to synonymous ratios for rare (dark orange bars) and common (light orange bars) variants, along with error bars showing 95% confidence intervals. The Venn diagram indicates the subset of exons; exons “Q” are those that produce the transcript with the highest QSplice score, “M” are present in MANE Select transcripts, and “P” produce principal isoforms. Here we compare the non-synonymous to synonymous ratios for exons that produce the transcript with the highest QSplice score and do not overlap with exons from principal transcripts (QSplice), against exons from transcripts alternative to QSplice reference transcripts (Alternative). The number of exons in the reference and alternative sets is indicated.
